# Supplementary material
Source: PubMed Central journal article supplement (PMC3037574)
Supplement: mmc1.pdf [file mmc1.pdf]

## Supporting Material

### Cy3 – DNA stacking interactions strongly depend on the identity of the terminal base pair

Justin Spiriti,<sup>†</sup> Jennifer Kaye Binder,<sup>†,‡</sup> Marcia Levitus,<sup>†,‡,\*</sup> and Arjan van der Vaart<sup>§,\*</sup>

<sup>†</sup> Department of Chemistry and Biochemistry and Center for Biological Physics, Arizona State University, PO Box 871604, Tempe, AZ 85287-1604

<sup>‡</sup> The Biodesign Institute, Arizona State University, PO Box 875601, Tempe AZ, 85287-5601

<sup>§</sup> Department of Chemistry, University of South Florida, 4202 E Fowler Ave CHE 205, Tampa, FL 33620

\* Corresponding authors. Email: avandervaart@usf.edu (AvdV), marcia.levitus@asu.edu (ML). Tel. 813-974-8762 (AvdV), 480-727-8586 (ML). Fax. 813-974-3203 (AvdV), 480-727-2378 (ML).

### Construction of initial Cy3-DNA configurations

B-form DNA structures were created with the fiber program of the 3DNA package (1). Upon alignment of the phosphorus atoms of the Cy3-labeled chain to the NMR structure of a Cy3+Cy5 labeled DNA strand (2), the coordinates of Cy3 and its linker were transferred to the model DNA. The systems were minimized using the GBMV implicit solvent model (3, 4) with harmonic restraints on the base atoms. After minimization, each system was placed in a rhombic dodecahedral box and solvated in explicit water (5), surrounding Cy3-DNA by at least 12 Å. The total charge was neutralized by 22 potassium ions, which were placed using the SOLVATE program (6). After a 450 ps heating of the water and ions while keeping Cy3-DNA fixed, the entire system was gradually heated to 300 K over 300 ps with harmonic restraints of 1 kcal/(mol Å<sup>2</sup>) on all non-hydrogen atoms. These restraints were gradually removed over 500 ps, followed by short unrestraint equilibration of 100 ps, and the production run.

### Quantum Chemical Calculations for Indocyanine Ring System

A normal mode calculation on dimethylindocarbocyanine in a C<sub>2v</sub>-symmetric conformation was performed at the B3LYP/6-31+G(d,p) (7, 8) level using Gaussian 03 (9).

Dimethylindocarbocyanine differs from Cy3 only in having the –NCH<sub>2</sub>CH<sub>2</sub>CH<sub>2</sub>OH linkers replaced by –NCH<sub>3</sub>. Numerical integrations for the DFT were performed using an ultrafine grid. The resulting frequencies were scaled by a factor of 1.0117 as recommended for low frequencies for this level of theory in a previous study (10). The lowest 10 frequencies are shown in Table S1.

In addition, a relaxed torsional scan on the C9A-N1A-CL3A-CL2A dihedral was performed at the B3LYP/6-31+g(d,p) level on a model compound that included one of the rings in the indocyanine ring system, an ethyl substituent on the nitrogen atom of the ring, and a –CH=CH<sub>2</sub> substituent to emulate part of the conjugated linker between the rings (Fig. S3).

## Parameterization of the Cy3 Fluorescent Dye

Parameters for the Cy3 dye were obtained by combining parameters for 3*H*-indole, 1,3,5-hexatriene, and *n*-propanol with additional parameters for guanine, methylcyclopentane, benzimidazole, neopentane, and retinol and its Schiff base modification where chemically appropriate and necessary to provide a complete parameter set. Atom names were assigned as shown in Fig. S1. All original parameters were taken from the CHARMM General Force Field (11). The atom types and partial charges are shown in Table S2. Several of the bond, angle, and dihedral parameters were adjusted as described (12) to match as many as possible of the lowest vibrational modes (those shown in Table S1) between the quantum calculation and the force field. The resulting parameters are shown in Tables S3, S4, and S5. The vibrational density of states for Cy3 from the force field and from the quantum calculation are shown in Fig. S2.

In addition, the CG321-CG324-NG2R52-CG2R52 and CG321-CG324-NG2R52-CG2RC0 dihedral parameters (for the C9-N1-CL3-CL2 and C2-N1-CL3-CL2 dihedrals) were adjusted so that a relaxed torsional scan on these dihedrals gave energy barriers similar to the quantum calculations. Energy profiles for this dihedral are shown in Fig. S3. Test simulations of a free Cy3 in explicit water were also performed, and the parameters were adjusted to prevent excessive twisting of the two rings about the conjugated linker.

## Time Trace of Center of Mass Distance Between Dye and First Base

A time trace of the center of mass distance between the Cy3 ring system and the first base on the strand to which Cy3 is attached is shown in Fig. S4.

## References

1. Lu, X.-J., and W. K. Olson. 2003. 3DNA: a software package for the analysis, rebuilding and visualization of three-dimensional nucleic acid structures. *Nucleic Acids Res.* 31:5108-5121.
2. Iqbal, A., L. Wang, K. C. Thompson, D. M. J. Lilley, and D. G. Norman. 2008. The Structure of Cyanine 5 Terminally Attached to Double-Stranded DNA: Implications for FRET Studies. *Biochemistry* 47:7857-7862.
3. Lee, M. S., M. Feig, F. R. Salsbury, and I. C.L. Brooks. 2003. New analytical approximation to the standard molecular volume definition and its application to generalized Born calculations. *J. Comp. Chem.* 25:265-284.
4. Lee, M. S., F. R. Salsbury, and I. C.L. Brooks. 2002. Novel generalized Born methods. *J. Chem. Phys.* 116:10606-10614.
5. Jorgensen, W., J. Chandrasekar, J. Madura, R. Impey, and M. Klein. 1983. Comparison of Simple Potential Functions for Simulating Liquid Water. *J. Chem. Phys.* 79:926-935.
6. Grubmüller, H., B. Heymann, and P. Tavan. 1996. Ligand Binding: Molecular Mechanics Calculation of the Streptavidin-Biotin Rupture Force. *Science* 271:997-999.
7. Becke, A. D. 1993. Density-functional thermochemistry. III. The role of exact exchange. *J. Chem. Phys.* 98:5648-5652.
8. Lee, C., W. Yang, and R. G. Parr. 1988. Development of the Colle-Salvetti correlation-energy formula into a functional of the electron density. *Phys. Rev. B* 37:785-789.

9. Frisch, M. J., G. W. Trucks, H. B. Schlegel, G. E. Scuseria, M. A. Robb, J. R. Cheeseman, J. J. A. Montgomery, T. Vreven, K. N. Kudin, J. C. Burant, J. M. Millam, S. S. Iyengar, J. Tomasi, V. Barone, B. Mennucci, M. Cossi, G. Scalmani, N. Rega, G. A. Petersson, H. Nakatsuji, M. Hada, M. Ehara, K. Toyota, R. Fukuda, J. Hasegawa, M. Ishida, T. Nakajima, Y. Honda, O. Kitao, H. Nakai, M. Klene, X. Li, J. E. Knox, H. P. Hratchian, J. B. Cross, V. Bakken, C. Adamo, J. Jaramillo, R. Gomperts, R. E. Stratmann, O. Yazyev, A. J. Austin, R. Cammi, C. Pomelli, J. W. Ochterski, P. Y. Ayala, K. Morokuma, G. A. Voth, P. Salvador, J. J. Dannenberg, V. G. Zakrzewski, S. Dapprich, A. D. Daniels, M. C. Strain, O. Farkas, D. K. Malick, A. D. Rabuck, K. Raghavachari, J. B. Foresman, J. V. Ortiz, Q. Cui, A. G. Baboul, S. Clifford, J. Cioslowski, B. B. Stefanov, G. Liu, A. Liashenko, P. Piskorz, I. Komaromi, R. L. Martin, D. J. Fox, T. Keith, M. A. Al-Laham, C. Y. Peng, A. Nanayakkara, M. Challacombe, P. M. W. Gill, B. Johnson, W. Chen, M. W. Wong, C. Gonzalez, and J. A. Pople. 2003. Gaussian 03. Gaussian, Inc., Wallingford, CT.
10. Merrick, J. P., D. Moran, and L. Radom. 2007. An Evaluation of Harmonic Vibrational Frequency Scale Factors. *J. Phys. Chem. A* 111:11683-11700.
11. Vanommesleghe, K., E. Hatcher, C. Acharya, S. Kundu, S. Zhong, J. Shim, E. Darian, O. Guvench, P. Lopes, I. Vorobyov, and A. D. M. Jr. 2009. CHARMM General Force Field: A Force Field for Drug-Like Molecules Compatible with the CHARMM All-Atom Additive Biological Force Fields. *J. Comput. Chem.* 31:671-690.
12. MacKerell, A. D. 2001. *Computational Biochemistry and Biophysics*. O. M. Becker, A. D. Mackerell, B. Roux, and M. Watanabe, editors. M. Dekker, New York. p7-38.

**Table S1.** Comparison of first 10 vibrational modes of Cy3 from the force field to those from the quantum chemistry calculation.

| Mode number | Irreducible representation of $C_{2v}$ | Scaled QM vibrational frequency ( $\text{cm}^{-1}$ ) | Force field mode number | Force field vibrational frequency ( $\text{cm}^{-1}$ ) |
|-------------|----------------------------------------|------------------------------------------------------|-------------------------|--------------------------------------------------------|
| 1           | $A_2$                                  | 19.8                                                 | 7                       | 22.3                                                   |
| 2           | $B_1$                                  | 26.3                                                 | 8                       | 30.7                                                   |
| 3           | $A_1$                                  | 36.5                                                 | 9                       | 41.7                                                   |
| 4           | $A_2$                                  | 46.7                                                 | 10                      | 64.0                                                   |
| 5           | $B_1$                                  | 66.4                                                 | n/a*                    | n/a                                                    |
| 6           | $A_2$                                  | 91.1                                                 | 12                      | 98.4                                                   |
| 7           | $B_1$                                  | 93.6                                                 | 11                      | 89.9                                                   |
| 8           | $A_2$                                  | 111.0                                                | n/a*                    | n/a                                                    |
| 9           | $B_2$                                  | 118.0                                                | 13                      | 124.1                                                  |
| 10          | $B_1$                                  | 131.5                                                | 14                      | 137.4                                                  |

\*No unique force field mode could be identified corresponding to these quantum modes.

**Table S2.** Atom types and partial charges for Cy3 dye.

| Atom names                                                                      | Atom type | Partial charge (electron) |
|---------------------------------------------------------------------------------|-----------|---------------------------|
| N1A, N1B                                                                        | NG2R52    | -0.11                     |
| C2A, C2B                                                                        | CG2R52    | 0.29                      |
| C3A, C3B                                                                        | CG3C50    | 0.09                      |
| C4A, C4B                                                                        | CG2RC0    | 0.25                      |
| C5A, C5B                                                                        | CG2R61    | -0.22                     |
| H5A, H5B                                                                        | HGR61     | 0.20                      |
| C6A, C6B                                                                        | CG2R61    | -0.22                     |
| H6A, H6B                                                                        | HGR61     | 0.21                      |
| C7A, C7B                                                                        | CG2R61    | -0.21                     |
| H7A, H7B                                                                        | HGR61     | 0.21                      |
| C8A, C8B                                                                        | CG2R61    | -0.34                     |
| H8A, H8B                                                                        | HGR61     | 0.26                      |
| C9A, C9B                                                                        | CG2RC0    | 0.23                      |
| CM1A, CM1B, CM2A,<br>CM2B                                                       | CG331     | -0.27                     |
| HM1A, HM2A, HM3A,<br>HM4A, HM5A, HM6A,<br>HM1B, HM2B, HM3B,<br>HM4B, HM5B, HM6B | HGA3      | 0.09                      |
| OL1A, OL1B                                                                      | OG311     | -0.65                     |
| HO1A, HO1B                                                                      | HGP1      | 0.42                      |
| CL1A, CL1B                                                                      | CG321     | 0.05                      |
| CL2A, CL2B                                                                      | CG321     | -0.18                     |
| CL3A, CL3B                                                                      | CG324     | -0.18                     |
| H11A, H12A, H21A, H22A,<br>H31A, H32A, H11B, H12B,<br>H21B, H22B, H31B, H32B    | HGA2      | 0.09                      |
| CX1, CX2, CX3                                                                   | CG2DC2    | -0.15                     |
| HX1, HX2, HX3                                                                   | HGA4      | 0.15                      |

**Table S3.** Bond parameters.

| Atom types    | Force constant (kcal/(mol Å <sup>2</sup> )) | Equilibrium length (Å) |
|---------------|---------------------------------------------|------------------------|
| CG2RC0-NG2R52 | 310.00                                      | 1.3650                 |
| CG2R52-CG2DC2 | 450.00                                      | 1.3000                 |
| CG324-NG2R52  | 300.00                                      | 1.4330                 |
| CG331-CG3C50  | 222.50                                      | 1.5280                 |
| CG2RC0-CG3C50 | 305.00                                      | 1.5200                 |
| CG2R52-CG3C50 | 350.00                                      | 1.5050                 |

**Table S4.** Angle and Urey-Bradley parameters

| Atom types               | Force constant<br>(kcal/mol/rad <sup>2</sup> ) | Equilibrium<br>angle (°) | Urey-Bradley<br>force constant<br>(kcal/mol-Å <sup>2</sup> ) | Equilibrium<br>Urey-Bradley<br>distance (Å) |
|--------------------------|------------------------------------------------|--------------------------|--------------------------------------------------------------|---------------------------------------------|
| CG2R52-NG2R52-<br>CG2RC0 | 60.00                                          | 107.20                   |                                                              |                                             |
| CG2R52-CG3C50-<br>CG2RC0 | 105.00                                         | 105.00                   |                                                              |                                             |
| CG2RC0-CG2RC0-<br>CG3C50 | 143.00                                         | 110.00                   |                                                              |                                             |
| CG2R61-CG2RC0-<br>CG3C50 | 60.00                                          | 130.00                   |                                                              |                                             |
| CG3C50-CG2R52-<br>NG2R52 | 170.00                                         | 112.00                   |                                                              |                                             |
| CG2RC0-NG2R52-<br>CG324  | 62.30                                          | 112.30                   |                                                              |                                             |
| CG2R52-NG2R52-<br>CG324  | 62.30                                          | 140.50                   |                                                              |                                             |
| CG2R61-CG2RC0-<br>NG2R52 | 130.00                                         | 130.00                   |                                                              |                                             |
| CG3C50-CG331-HGA3        | 33.43                                          | 110.10                   | 22.53                                                        | 2.17900                                     |
| CG2DC2-CG2DC2-<br>CG2DC2 | 17.30                                          | 123.00                   |                                                              |                                             |
| CG2DC2-CG2DC2-<br>CG2R52 | 40.00                                          | 123.00                   |                                                              |                                             |
| CG2DC2-CG2R52-<br>NG2R52 | 10.00                                          | 125.60                   |                                                              |                                             |
| CG2R52-CG3C50-<br>CG331  | 32.00                                          | 112.20                   |                                                              |                                             |
| CG2RC0-CG3C50-<br>CG331  | 32.00                                          | 112.20                   |                                                              |                                             |
| CG331-CG3C50-CG331       | 58.35                                          | 113.50                   | 11.16                                                        | 2.561                                       |
| CG2DC2-CG2R52-<br>CG3C50 | 10.00                                          | 123.50                   |                                                              |                                             |
| CG2RC0-CG2RC0-<br>NG2R52 | 100.00                                         | 110.00                   |                                                              |                                             |
| NG2R52-CG331-HGA3        | 33.43                                          | 110.10                   |                                                              |                                             |
| NG2R52-CG321-HGA2        | 33.43                                          | 110.10                   |                                                              |                                             |
| NG2R52-CG324-HGA2        | 33.43                                          | 110.10                   |                                                              |                                             |
| CG321-CG324-NG2R52       | 70.00                                          | 113.70                   |                                                              |                                             |
| CG2R52-CG2DC2-<br>HGA4   | 25.50                                          | 119.00                   |                                                              |                                             |

**Table S5.** Dihedral parameters.

| Atom types                  | Force constant (kcal/(mol rad <sup>2</sup> )) | Multiplicity | Phase (°) |
|-----------------------------|-----------------------------------------------|--------------|-----------|
| CG2DC2-CG2R52-NG2R52-CG324  | 1.0000                                        | 2            | 180.00    |
| CG2DC2-CG2R52-NG2R52-CG2RC0 | 1.5000                                        | 2            | 180.00    |
| HGA4-CG2DC2-CG2R52-NG2R52   | 0.5000                                        | 2            | 180.00    |
| CG3C50-CG2R52-NG2R52-CG324  | 1.0000                                        | 2            | 180.00    |
| HGA2-CG324-NG2R52-CG2R52    | 0.1500                                        | 3            | 180.00    |
| HGA2-CG324-NG2R52-CG2RC0    | 0.1500                                        | 3            | 180.00    |
| CG3C50-CG2R52-CG2DC2-CG2DC2 | 0.9000                                        | 1            | 0.00      |
| CG3C50-CG2R52-CG2DC2-CG2DC2 | 2.1000                                        | 2            | 180.00    |
| CG3C50-CG2R52-CG2DC2-CG2DC2 | 0.2200                                        | 3            | 0.00      |
| CG3C50-CG2R52-CG2DC2-CG2DC2 | 0.2500                                        | 5            | 180.00    |
| CG3C50-CG2R52-CG2DC2-CG2DC2 | 0.1000                                        | 6            | 0.00      |
| CG3C50-CG2R52-CG2DC2-HGA4   | 0.5000                                        | 2            | 180.00    |
| NG2R52-CG2R52-CG3C50-CG331  | 0.5000                                        | 2            | 0.00      |
| NG2R52-CG2R52-CG3C50-CG331  | 0.4000                                        | 3            | 0.00      |
| CG2DC2-CG2R52-CG3C50-CG331  | 0.3000                                        | 3            | 0.00      |
| CG2RC0-CG2RC0-CG3C50-CG331  | 0.5000                                        | 2            | 0.00      |
| CG2RC0-CG2RC0-CG3C50-CG331  | 0.4000                                        | 3            | 0.00      |
| CG2R61-CG2RC0-CG3C50-CG331  | 0.5000                                        | 2            | 0.00      |
| CG2R61-CG2RC0-CG3C50-CG331  | 0.4000                                        | 3            | 0.00      |
| CG2R52-CG3C50-CG331-HGA3    | 0.1600                                        | 3            | 0.00      |
| CG2RC0-CG3C50-CG331-HGA3    | 0.1600                                        | 3            | 0.00      |
| CG331-CG3C50-CG331-HGA3     | 0.1600                                        | 3            | 0.00      |
| CG2DC2-CG2R52-CG3C50-CG2RC0 | 0.0000                                        | 3            | 0.00      |
| NG2R52-CG2R52-CG3C50-CG2RC0 | 1.3000                                        | 3            | 180.00    |
| CG3C50-CG2R52-NG2R52-CG2RC0 | 6.0000                                        | 2            | 180.00    |
| CG2R61-CG2R61-CG2RC0-CG3C50 | 0.0000                                        | 2            | 180.00    |
| CG2R61-CG2R61-CG2RC0-NG2R52 | 1.5000                                        | 2            | 180.00    |
| CG2R61-CG2RC0-CG2RC0-CG3C50 | 2.5000                                        | 2            | 180.00    |
| CG2RC0-CG2RC0-CG3C50-CG2R52 | 0.5000                                        | 3            | 180.00    |
| CG2R61-CG2RC0-NG2R52-CG2R52 | 4.0000                                        | 2            | 180.00    |
| CG2R61-CG2RC0-CG3C50-CG2R52 | 3.5000                                        | 3            | 0.00      |
| CG2RC0-CG2RC0-NG2R52-CG2R52 | 4.0000                                        | 2            | 180.00    |
| CG3C50-CG2RC0-CG2RC0-NG2R52 | 6.5000                                        | 2            | 180.00    |
| CG2R61-CG2RC0-CG2RC0-NG2R52 | 1.5000                                        | 2            | 180.00    |
| HGR61-CG2R61-CG2RC0-NG2R52  | 0.8000                                        | 2            | 180.00    |
| HGR61-CG2R61-CG2RC0-CG3C50  | 0.0000                                        | 2            | 180.00    |
| CG2RC0-CG2RC0-NG2R52-CG324  | 9.0000                                        | 2            | 180.00    |
| CG2R61-CG2RC0-NG2R52-CG324  | 9.0000                                        | 2            | 180.00    |
| CG2R52-CG2DC2-CG2DC2-CG2DC2 | 0.5600                                        | 1            | 180.00    |
| CG2R52-CG2DC2-CG2DC2-CG2DC2 | 4.0000                                        | 2            | 180.00    |
| NG2R52-CG2R52-CG2DC2-CG2DC2 | 0.5600                                        | 1            | 180.00    |
| NG2R52-CG2R52-CG2DC2-CG2DC2 | 9.0000                                        | 2            | 180.00    |
| CG2DC2-CG2DC2-CG2DC2-HGA4   | 5.2000                                        | 2            | 180.00    |
| CG2R52-CG2DC2-CG2DC2-HGA4   | 5.2000                                        | 2            | 180.00    |
| HGA2-CG321-CG324-NG2R52     | 0.1950                                        | 3            | 0.00      |
| CG321-CG321-CG324-NG2R52    | 0.1950                                        | 3            | 0.00      |
| CG321-CG324-NG2R52-CG2R52   | 2.2500                                        | 1            | 0.00      |
| CG321-CG324-NG2R52-CG2R52   | 0.9000                                        | 2            | 180.00    |
| CG321-CG324-NG2R52-CG2RC0   | 2.2500                                        | 1            | 180.00    |
| CG321-CG324-NG2R52-CG2RC0   | 0.9000                                        | 2            | 180.00    |
| CG324-CG321-CG321-OG303     | 0.1950                                        | 3            | 0.00      |
| CG324-CG321-CG321-OG311     | 0.1950                                        | 3            | 0.00      |
| CG324-CG321-CG321-ON2       | 0.1950                                        | 3            | 0.00      |



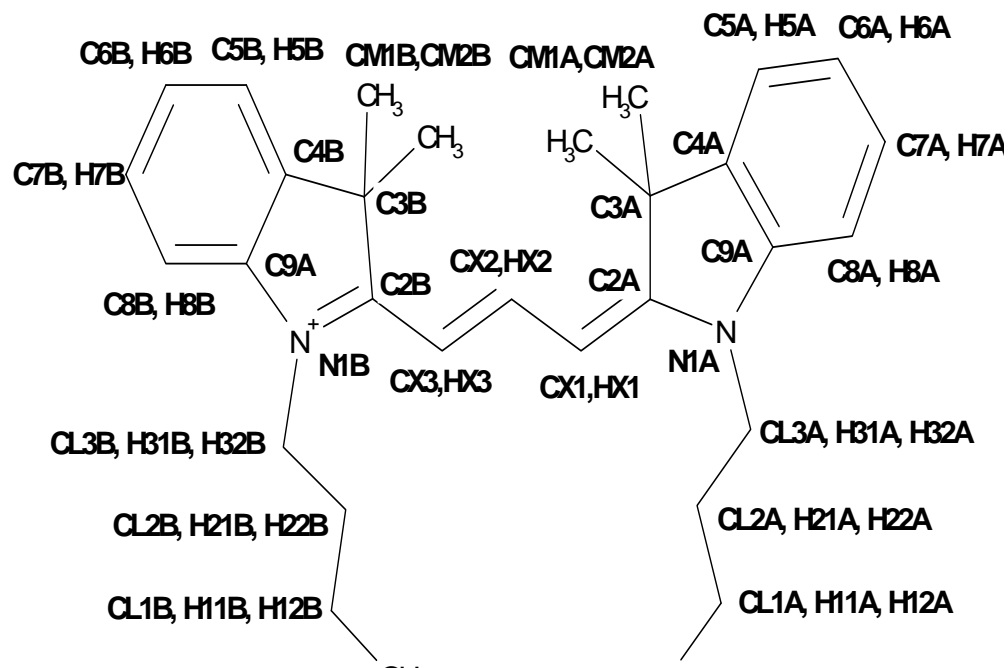

**Figure S1.** Structure of Cy3 with CHARMM atom names in bold.

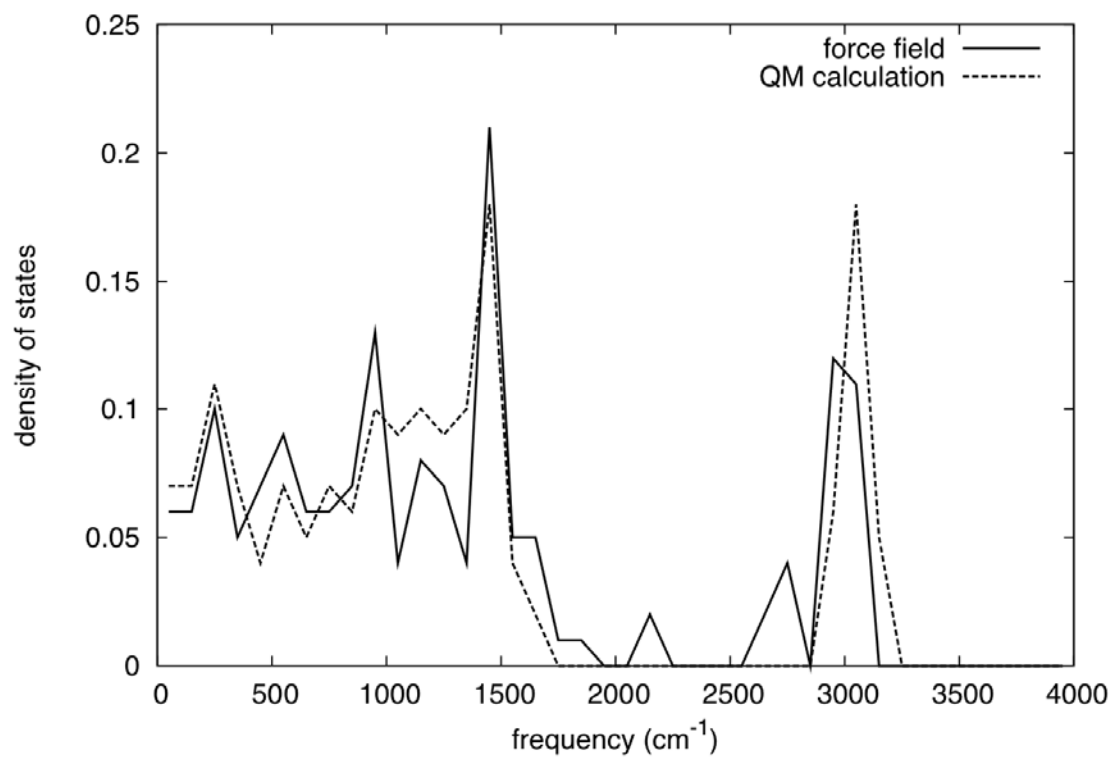

**Figure S2.** Vibrational density of states for Cy3 from force field and from QM calculation.

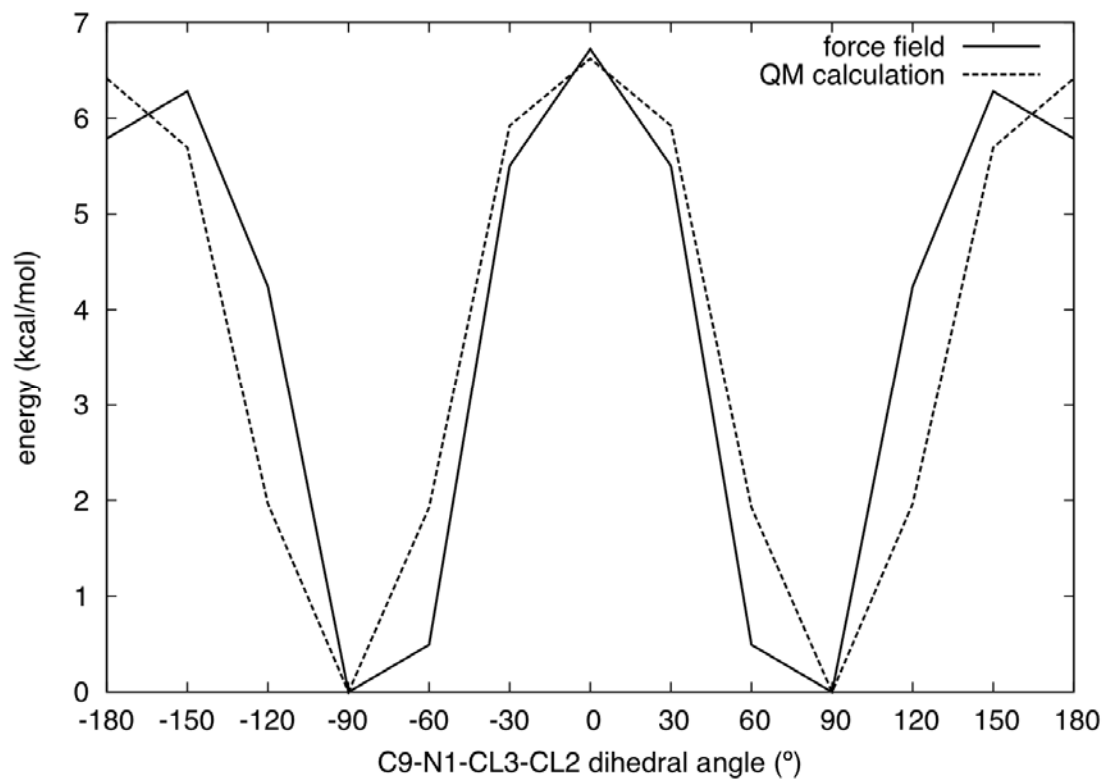

**Figure S3.** Comparison of energy profiles around C9-N1-CL3-CL2 dihedral from force field and quantum calculation.

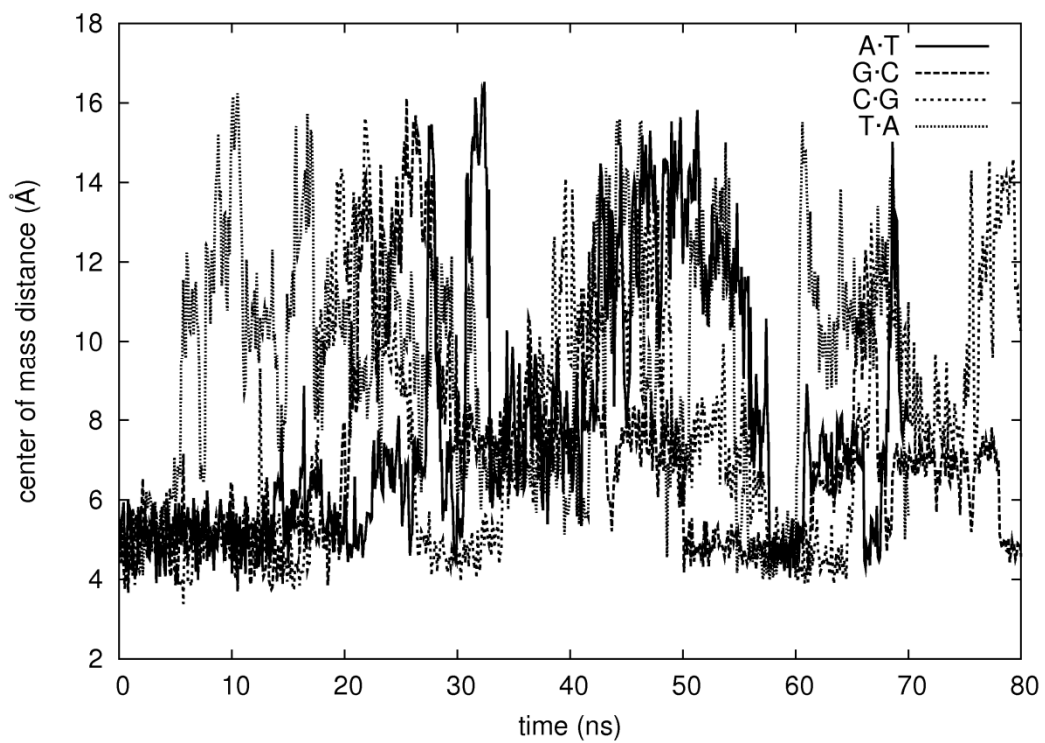

**Figure S4.** Center of mass distance between Cy3 and first base as a function of time.
